# Supplementary material for: Mapping mutations in plant genomes with the user-friendly web application CandiSNP
Source: PubMed Central journal article supplement (PMC4301057; doi:10.1186/s13007-014-0041-7), 2014-12-30
Supplement: 13007_2014_41_MOESM2_ESM.pdf [file 13007_2014_41_MOESM2_ESM.pdf]

```
1  #!/usr/bin/env ruby
2  #
3  # untitled
4  #
5  # Created by Dan MacLean (TSL) on 2013-01-09.
6  # Copyright (c) . All rights reserved.
7  #####
8  require 'rubygems'
9  require 'bio-samtools'
10 require 'bio-gngm'
11
12 sequences = Bio::DB::FastaLengthDB.new(:file => ARGV[0])
13
14 bam = Bio::DB::Sam.new(:bam=>ARGV[1], :fasta=>ARGV[0])
15 bam.open
16 puts("Chr", "Pos", "Ref", "Alt", "Allele_Freq")
17 sequences.each do |id,length|
18   $stderr.puts "on #{id}:1-#{length} "
19   bam.mpileup(:r => "#{id}:1-#{length}", :Q => 20, :q => 20) do |pileup|
20     #puts "Consensus: " + pileup.consensus
21     if pileup.is_snp?(:ignore_reference_n => true, :min_depth => 6, :min_non_ref_count => 3) and pileup.consensus != pileup.ref_base
22       mut = "FALSE"
23       mut = "TRUE" if (pileup.ref_base == 'G' and pileup.consensus == 'A') or (pileup.ref_base == 'C' and pileup.consensus == 'T')
24       puts [pileup.ref_name, pileup.pos, pileup.ref_base, pileup.consensus, pileup.non_ref_count / pileup.coverage, mut ].join(",")
25     end
26   end
27 end
```

### Additional File 2: SNP calling script.

To create our CandiSNP input files we used the `pileups_to_snps.rb` Ruby script which relies on the `bio-samtools` and `bio-gngm` Ruby Gems. The input data is the FASTA reference sequence (TAIR10 genome in this case) and the SAM/BAM alignment file for each dataset. The output is a comma-delimited file of SNPs formatted for input to the CandiSNP application. The source code for this script is available at:

[https://github.com/danmaclean/candisnp/blob/master/pileup\\_to\\_snps.rb](https://github.com/danmaclean/candisnp/blob/master/pileup_to_snps.rb)
