# Supplementary material for: Mapping mutations in plant genomes with the user-friendly web application CandiSNP
Source: PubMed Central journal article supplement (PMC4301057; doi:10.1186/s13007-014-0041-7), 2014-12-30
Supplement: 13007_2014_41_MOESM5_ESM.pdf [file 13007_2014_41_MOESM5_ESM.pdf]

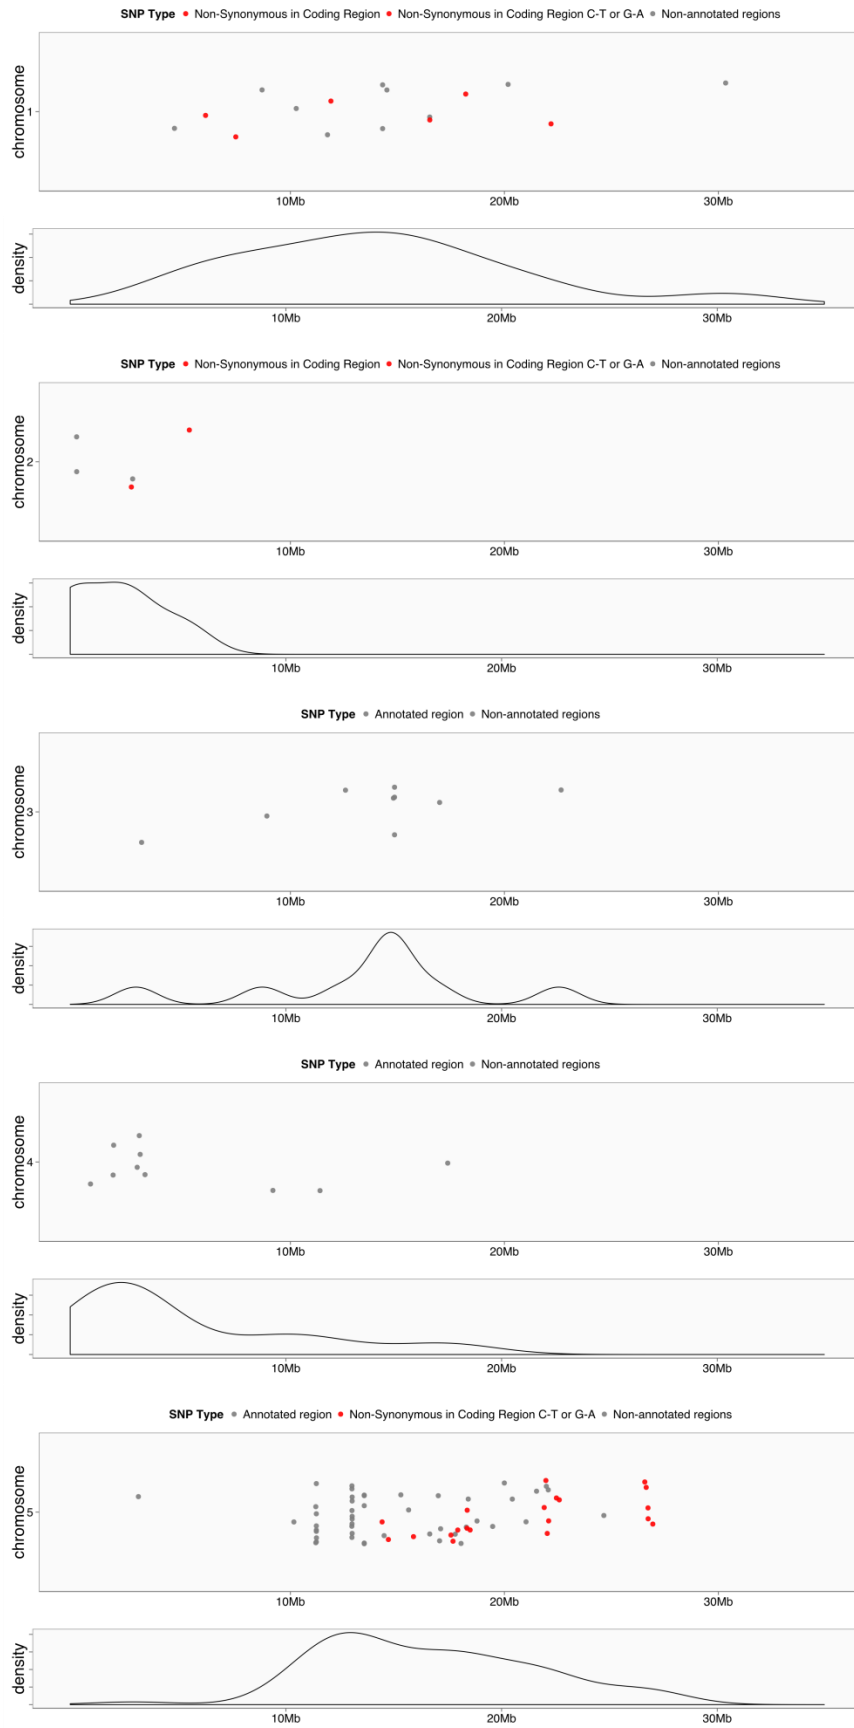

**Additional File 5: Genome-wide SNP density plots for *bak1-5 mob2*.**

All SNPs with allele frequencies >75% are plotted in grey, while candidate causative SNPs (defined as those causing non-synonymous changes in gene-coding regions) are plotted in red. These plots are also available at <http://dx.doi.org/10.6084/m9.figshare.1250027>.
