# Supplementary material for: Mapping mutations in plant genomes with the user-friendly web application CandiSNP
Source: PubMed Central journal article supplement (PMC4301057; doi:10.1186/s13007-014-0041-7), 2014-12-30
Supplement: 13007_2014_41_MOESM6_ESM.pdf [file 13007_2014_41_MOESM6_ESM.pdf]

***bak1-5 mob1***

| <b>SNP location</b>  | <b>Primer sequence (5'-3')</b> |
|----------------------|--------------------------------|
| I_825457_F           | TGTGAATAGAATGGACTCTC           |
| I_825457_R           | TGCCATAGGATCTCTCACTT           |
| I_11892068/070/252_F | TCTTCTCGTCCCACATATC            |
| I_11892068/070/252_R | AACAAGGTGATGAAGAAATGGA         |
| I_16516501_F         | GATCGGGGTTCTCAAAGT             |
| I_16516501_F         | CACAAGATGATGTTCATAAAGT         |
| I_16525522_F         | CTCATCAGTACTATAGTCCTC          |
| I_16525522_F         | TGTTCACTAGGACCCTTAGTGT         |
| I_24243231_F         | TGCAGAGATGTCTACCACGG           |
| I_24243231_R         | TATCACTATGAGTGACACTTA          |
| V_23206476_F         | ACACATTTGACCGCTGAATCAC         |
| V_23206476_R         | TGTGATTGCTTATATAATCATC         |
| V_26457834_F         | AGATTCGCCTCTAAAGGCTA           |
| V_26457834_R         | TTCTCTAACCCACGCATGTG           |
| V_26458077_F         | AGATTCGCCTCTAAAGGCTA           |
| V_26458077_R         | TTCTCTAACCCACGCATGTG           |
| V_26474069_F         | CGTTGAGA ACTTGATCAATG          |
| V_26474069_R         | GAGGATCTGTTTCAGTTTCG           |

***bak1-5 mob2***

| <b>SNP location</b> | <b>Primer sequence (5'-3')</b> |
|---------------------|--------------------------------|
| I_7446564_F         | AGAAAATTAAGCACCGGA             |
| I_7446564_R         | TGTGTTGTAATATTCTGG             |
| I_11892984_F        | TCTGCAACATCATTATATTCATCATGT    |
| I_11892984_F        | TTAGGCATCGAAAGAGTTCC           |
| I_16513961_F        | TGATCGGACTCAGCATAATCCT         |
| I_16513961_F        | CTACAAGTCATCTAGGGCCAA          |
| I_17757465_F        | TGCTGCGACTCGGTATTC             |
| I_17757465_R        | CCAGAATTCATAAACAAT             |
| I_18192647_F        | GAGTTCGGCCA ACTCAATGAC         |
| I_18192647_R        | TTGCAAGCATTTCGACAAGTACCT       |
| I_22178447_F        | TGTTCAAGCCGCTATTCCAAGA         |
| I_22178447_R        | TAGTATGAATAAGTCTTTGG           |
| II_2568811_F        | TGCCCTTTCAACCAATTCGG           |
| II_2568811_R        | TCGCAGATGGGTAAGAGCAGC          |
| IV_2362567_F        | ACGGTTTACTAACCAATTAC           |
| IV_2362567_R        | TGGAAGGGTGCAAGGAACGGATG        |
| V_5569896_F         | GTGATATATGAGGAACAGAAG          |
| V_5569896_R         | AGATCTTCGAGCCAGCTCTCGGG        |
| V_14285189_F        | CTGGTTGCCAAACATAAC             |
| V_14285189_R        | GGAATGACGACTCAGGACGGAGCTG      |
| V_15751875_F        | TGGGTATTATAGGAATGGTT           |
| V_15751875_R        | ATTGCACTCCAAGGACCGGTATGG       |
| V_17503318_F        | TGCACCAGGCATAATT               |
| V_17503318_R        | ATTCAGCTGAACTATCTAC            |

|              |                           |
|--------------|---------------------------|
| V_17820568_F | TCTGACAGCAAAGCTGGAGAT     |
| V_17820568_R | TAGATTCAAACCTAATCATACT    |
| V_18251689_F | CGTTAATTAATTTGTAGT        |
| V_18251689_R | CCTTAGCTGCTTCTGCTCCTT     |
| V_18261108_F | CTTGCTGACACTTTAGAGTC      |
| V_18261108_R | CTCATCAATAACCACCTCTTCTTG  |
| V_18399206_F | ATGGCGGTGAGTTTGACGG       |
| V_18399206_R | TCGGAACCTGTTATGAACAACCTTG |
| V_21859555_F | CTGCATGGAGTGTCTGGCGAA     |
| V_21859555_R | CATTAGACATGGTACTATCA      |
| V_21939106_F | GACTTTGTGTGCCACTACTTTA    |
| V_21939106_R | TGGCCAACATTTTGCATCCACAG   |
| V_22002355_F | ATATTGACCAGCAATAGCTT      |
| V_22002355_R | GACCATTGGAACGCCGCCATTTCG  |
| V_22066915_F | GATTTTCATACCTTAAATTAGTG   |
| V_22066915_R | ATATCATCAGTTGATAAAGCAT    |
| V_22430866_F | CTTCTCAATGGGGACATCATG     |
| V_22430866_R | GAGACGGTGACGTTTCCTG       |
| V_22449787_F | GGCGGAGGAACAAGGTTCC       |
| V_22449787_R | AAAGGATTGGATGACT          |
| V_22565056_F | GACAATAAAAGCATTAGCTAA     |
| V_22565056_R | CTCTAAGTCATCATCATGTTGT    |
| V_26458017_F | AGATTCGCCTCTAAAGGCTA      |
| V_26458017_R | TTCTCTAACCCACGCATGTG      |
| V_26560691_F | CAAGTTTCTAACAAGAAC        |
| V_26560691_R | CTGATTCTGGGTTCTCA         |
| V_26626055_F | CCCGACGAACCGGTGTACCG      |
| V_26626055_R | TCCACCTAGAAATATCCTCCTTT   |
| V_26710709_F | GGTTATAGTTTCTTAGGAAG      |
| V_26710709_R | TCCCATAGTTACAAGTCATTAC    |
| V_26716839_F | CGTTTCAATATCTGCAATACT     |
| V_26716839_R | TGTGGTACTCTTGTGGTT        |
| V_26935248_F | TCAGGAGCTAGGCCTAACATG     |
| V_26935248_R | CCACGCCGGAGGCACTGTAAG     |

**Additional File 6: Primers used in this study.**

Genomic regions containing candidate SNPs in *bak1-5 mob1* and *bak1-5 mob2* were amplified by PCR using these primers and Sanger-sequenced alongside *bak1-5* as a control.
